# Supplementary material for: MicroRNAs 146a/b-5 and 425-3p and 24-3p are markers of antidepressant response and regulate MAPK/Wnt-system genes
Source: PubMed Central journal article supplement (PMC5477510; doi:10.1038/ncomms15497), 2017-05-22
Supplement: ncomms15497-s1.pdf [file ncomms15497-s1.pdf]

**SUPPLEMENTARY FIGURES**

**Supplementary Figure. 1. Validation in Plasma:** Expression (number of reads/million, Log2) levels of miR-146a-5p, miR-146b-5p, and miR-24-3p after 8 weeks in MDD patients who responded to duloxetine treatment. \*\*\*indicates P<0.001. Levels of miRNA in plasma are considerably lower and more variable than in whole blood. We were not able to obtain reliable measures for miR-425-3p in plasma samples.

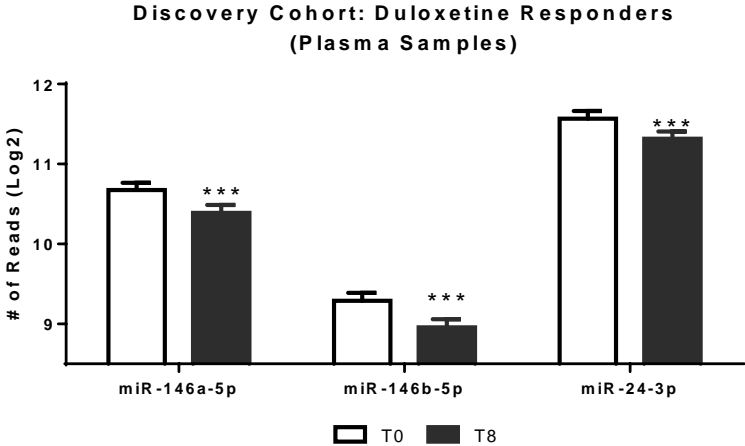

**Supplementary Figure. 2. MicroRNA correlations in brain:** Scatterplots of Pearson correlations between differentially expressed miRNAs in postmortem brain (vPFC) samples.

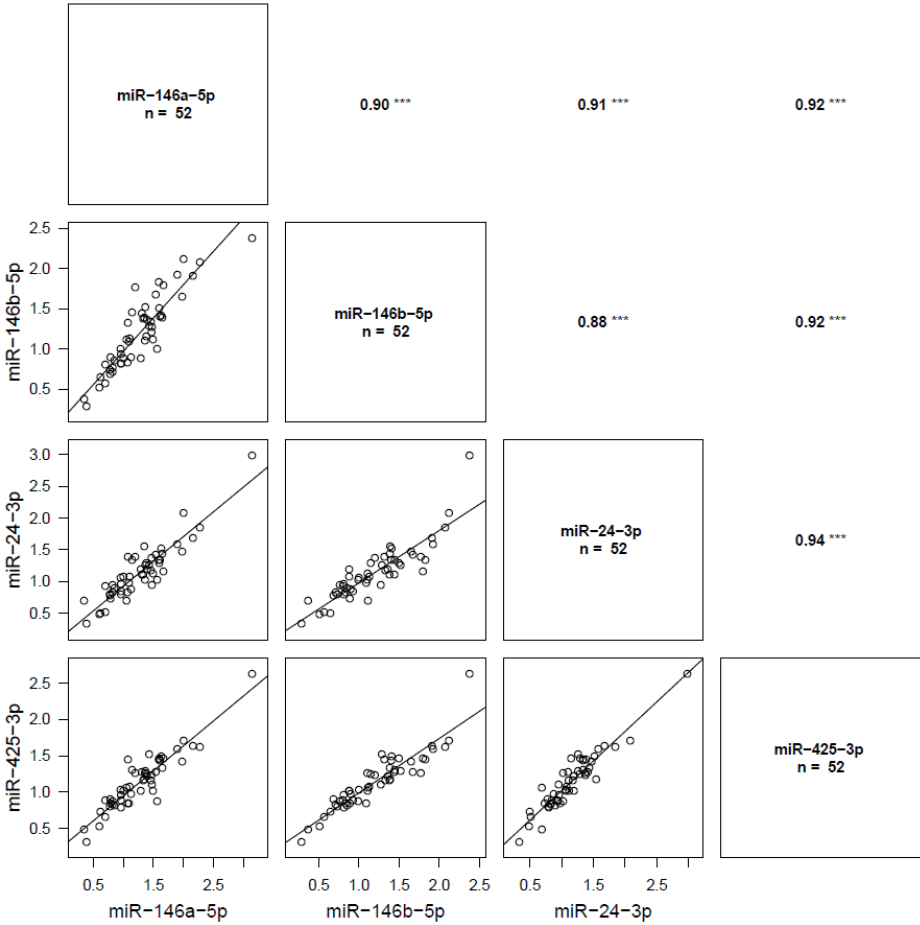

**Supplementary Figure 3. Discovery Cohort – Predicted target genes involved in MAPK and Wnt signaling pathways:** Differential expression analysis of MAPK/Wnt genes identified through our computational analysis. Most of the predicted targets were significantly dysregulated after duloxetine treatment (25 out of 36 genes, 69%).

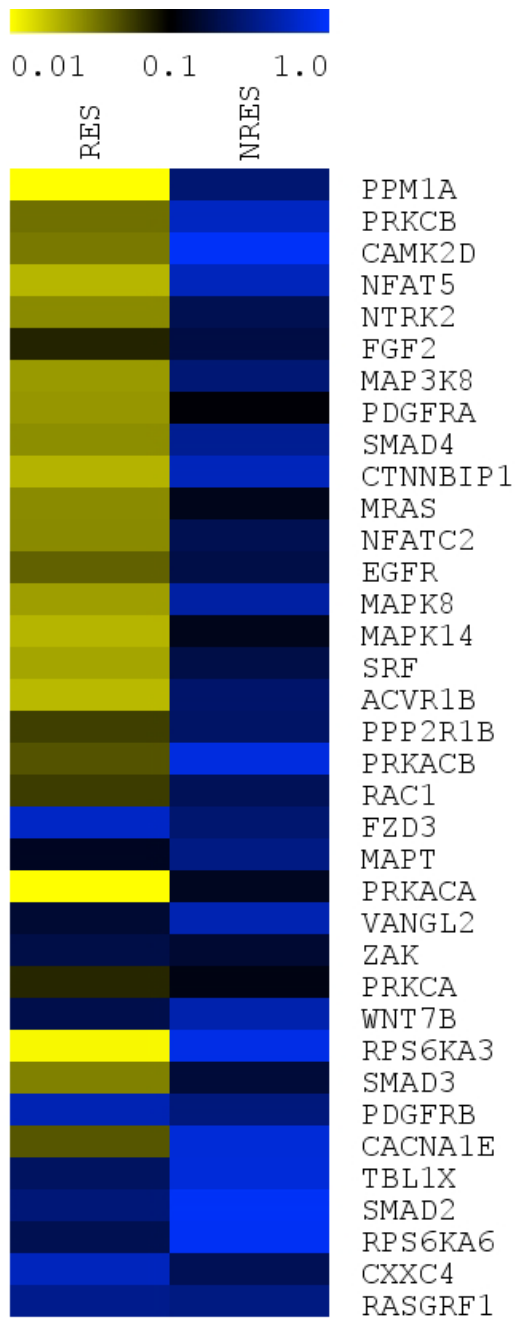

**Supplementary Figure. 4. Expression of miR-146a-5p, miR-146b-5p, miR-24-3p and miR-425-3p in human whole-blood and postmortem brain samples:** Small RNA sequencing data (number of reads/million, Log<sub>2</sub>) expression data for miR-146a-5p, miR-146b-5p, miR-24-3p and miR-425-3p in whole-blood and vPFC of postmortem brains.

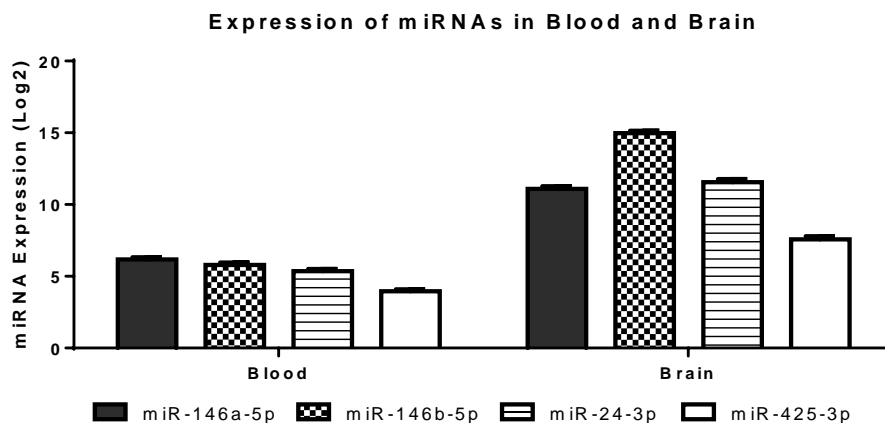

**Supplementary Figure. 5. Expression of miR-146a-5p, miR-146b-5p, miR-24-3p and miR-425-3p in other human biological fluids:** Small RNA sequencing data (number of reads/million, Log<sub>2</sub>) expression data for miR-146a-5p, miR-146b-5p, miR-24-3p and miR-425-3p in human plasma (N=37), serum (N=13), saliva (N=3) and semen/sperm (N=4). miRmine Database: <http://guanlab.cmb.med.umich.edu/mirmine/>

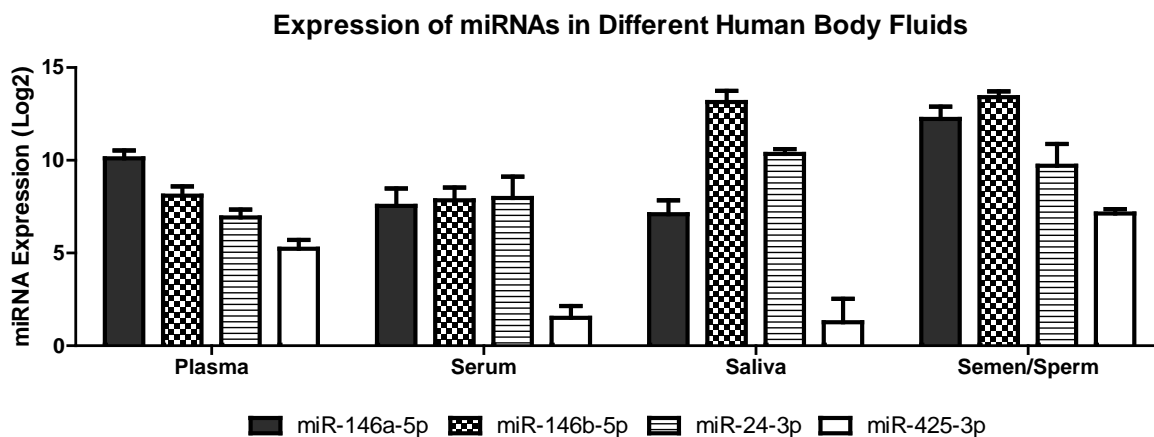

## SUPPLEMENTARY TABLES

**Supplementary Table 1.** Duloxetine Treated Samples: Expression of miR-146a-5p, miR-146b-5p, miR-24-3p, and miR-425-3p in responders vs. non-responders from the discovery cohort.

| microRNA        | Adj P value - Responders | Adj P value – Non-Responders |
|-----------------|--------------------------|------------------------------|
| hsa-miR-425-3p  | 2.63949E-08              | 0.205673072                  |
| hsa-miR-24-3p   | 6.81342E-06              | 0.271682804                  |
| hsa-miR-146a-5p | 3.74787E-05              | 0.271682804                  |
| hsa-miR-146b-5p | 0.001448493              | 0.722733069                  |

**Supplementary Table 2.** Placebo Treated Samples: Expression of miR-146a-5p, miR-146b-5p, miR-24-3p, and miR-425-3p in responders vs. non-responders from the discovery cohort.

| microRNA        | Adj P value - Responders | Adj P value – Non-Responders |
|-----------------|--------------------------|------------------------------|
| hsa-miR-425-3p  | 0.000141454              | 0.278461101                  |
| hsa-miR-24-3p   | 0.000325475              | 0.203927569                  |
| hsa-miR-146a-5p | 1.86011E-05              | 0.269224663                  |
| hsa-miR-146b-5p | 0.003720756              | 0.59572429                   |

**Supplementary Table 3.** Technical Validation: MicroRNAs selected for technical validation. In total, 13 out 15 (87%) miRNA targets tested were validated. Small RNA sequencing results were validated with a custom miRNA panel using circulatory miRNA assays by Firefly (BioWorks). Bold font denotes statistical significance.

| miRNA              | Group       | FC          | P value - RES    |
|--------------------|-------------|-------------|------------------|
| <b>miR-24-3p</b>   | Target      | <b>0,75</b> | <b>1,691E-07</b> |
| <b>miR-425-3p</b>  | Target      | <b>0,62</b> | <b>5,373E-04</b> |
| miR-324-5p         | Target      | 0,77        | <b>1,366E-03</b> |
| miR-361-3p         | Target      | 0,78        | <b>0,002</b>     |
| miR-425-5p         | Target      | 0,83        | <b>0,002</b>     |
| miR-423-3p         | Target      | 1,23        | <b>0,004</b>     |
| miR-361-5p         | Target      | 0,81        | <b>0,006</b>     |
| <b>miR-146a-5p</b> | Target      | <b>0,88</b> | <b>0,011</b>     |
| miR-6750-3p        | Target      | 1,41        | <b>0,031</b>     |
| <b>miR-146b-5p</b> | Target      | <b>0,87</b> | <b>0,035</b>     |
| miR-3173-5p        | Target      | 1,20        | <b>0,036</b>     |
| miR-3605-3p        | Target      | 1,22        | <b>0,040</b>     |
| miR-3074-5p        | Target      | 0,69        | <b>0,086</b>     |
| miR-1180-3p        | Target      | 1,03        | 0,417            |
| miR-6511a-3p       | Target      | 1,00        | 0,487            |
| Let-7b-5p          | End Control | 0,99        | 0,462            |
| Let-7i-5p          | End Control | 1,02        | 0,319            |
| miR-19b-3p         | End Control | 0,97        | 0,311            |

**Supplementary Table 4.** Correlation between the five differentially expressed miRNAs in duloxetine and placebo responders. Significant *P* values and Pearson coefficients (*r*).

| Pearson's <i>r</i> /<br>( <i>P</i> Values) | miR-146a-5p    | miR-146b-5p    | miR-24-3p       | miR-3074-5p    | miR-425-3p |
|--------------------------------------------|----------------|----------------|-----------------|----------------|------------|
| miR-146a-5p                                | 1              | X              | X               | X              | X          |
| miR-146b-5p                                | 0.70 (6.9E-38) | 1              | X               | X              | X          |
| miR-24-3p                                  | 0.70 (8.5E-38) | 0.39 (3.1E-10) | 1               | X              | X          |
| miR-3074-5p                                | 0.62 (3.2E-27) | 0.29 (3.1E-6)  | 0.97 (1.2E-162) | 1              | X          |
| miR-425-3p                                 | 0.77 (1.6E-50) | 0.55 (2.8E-21) | 0.73 (6.8E-43)  | 0.64 (2.1E-30) | 1          |

**Supplementary Table 5. Replication Cohort 1.** Differential expression of miRNAs after 8 weeks of antidepressant treatment. MiRNAs are ranked according to *P* values and fold change (FC).

| miRNA       | FC (T0 vs T8) | P value - RES |
|-------------|---------------|---------------|
| miR-425-3p  | 0.81          | 0.023         |
| miR-24-3p   | 0.83          | 0.035         |
| miR-146a-5p | 0.82          | 0.030         |
| miR-146b-5p | 0.83          | 0.041         |
| miR-3074-5p | <b>0.95</b>   | <b>0.333</b>  |

**Supplementary Table 6. Replication Cohort 2.** Differential expression of miRNAs after 8 weeks of antidepressant treatment. MiRNAs are ranked according to *P* values and fold change (FC).

| miRNA       | FC (T0 vs T8) | P value - RES |
|-------------|---------------|---------------|
| miR-425-3p  | 0.99          | 0.480         |
| miR-24-3p   | 0.89          | 0.023         |
| miR-146a-5p | 0.80          | 0.045         |
| miR-146b-5p | 0.73          | 0.030         |

**Supplementary Table 7. Hematology data analysis:** Cell count analysis performed in blood samples from MDD patients treated with Duloxetine (Discovery Cohort).

| Cell Type   | Responders -Duloxetine |                 |             | Non-Responders – Duloxetine |                 |             |
|-------------|------------------------|-----------------|-------------|-----------------------------|-----------------|-------------|
|             | Baseline               | After Treatment | P-value     | Baseline                    | After Treatment | P-value     |
| Leukocytes  | 6.5 ± 1.6              | 6.4 ± 1.4       | <b>0,76</b> | 6.69 ± 1.9                  | 6.9 ± 2.1       | <b>0,25</b> |
| Basophils   | 0.35 ± 0.19            | 0.33 ± 0.2      | <b>0,84</b> | 0.36 ± 0.19                 | 0.37 ± 0.2      | <b>0,55</b> |
| Eosinophils | 2.3 ± 0.16             | 2.5 ± 0.16      | <b>0,11</b> | 2.9 ± 0.21                  | 2.9 ± 0.22      | <b>0,45</b> |
| Lymphocytes | 29.2 ± 6.8             | 29.5 ± 6.8      | <b>0,95</b> | 32.4 ± 9.2                  | 30.1 ± 7.3      | <b>0,41</b> |
| Monocytes   | 6.6 ± 2.3              | 6.7 ± 2.0       | <b>0,51</b> | 6.5 ± 2.0                   | 6.7 ± 2.2       | <b>0,64</b> |
| Neutrophils | 61.6 ± 8.6             | 60.7 ± 8.3      | <b>0,57</b> | 57.9 ± 10.8                 | 58.6 ± 8.4      | <b>0,80</b> |

**Supplementary Table 8. Hematology data analysis:** Cell count analysis performed in blood samples from MDD patients treated with a placebo control (Discovery Cohort).

| Cell Type          | Responders -Placebo |                 |             | Non-Responders – Placebo |                 |             |
|--------------------|---------------------|-----------------|-------------|--------------------------|-----------------|-------------|
|                    | Baseline            | After Treatment | P-value     | Baseline                 | After Treatment | P-value     |
| <b>Leukocytes</b>  | 6.6 ± 2.1           | 6.5 ± 1.5       | <b>0,67</b> | 6.8 ± 1.9                | 6.7 ± 1.9       | <b>0,61</b> |
| <b>Basophils</b>   | 0.44 ± 0.3          | 0.43 ± 0.2      | <b>0,86</b> | 0.35 ± 0.2               | 0.41 ± 0.2      | <b>0,24</b> |
| <b>Eosinophils</b> | 2.3 ± 0.17          | 2.9 ± 0.2       | <b>0,34</b> | 2.5 ± 0.14               | 2.5 ± 0.177     | <b>0,57</b> |
| <b>Lymphocytes</b> | 30.2 ± 8.6          | 31.0 ± 7.0      | <b>0,62</b> | 31.1 ± 8.2               | 31.4 ± 6.9      | <b>0,70</b> |
| <b>Monocytes</b>   | 6.8 ± 2.9           | 7.2 ± 2.9       | <b>0,37</b> | 6.6 ± 2.4                | 6.1 ± 2.2       | <b>0,28</b> |
| <b>Neutrophils</b> | 59.1 ± 10.6         | 57.4 ± 9.4      | <b>0,39</b> | 59.5 ± 9.4               | 58.7 ± 7.7      | <b>0,95</b> |

**Supplementary Table 9.** Correlation between miR-146a-5p, miR-146b-5p, miR-24-3p and miR-425-3p in postmortem brains of subjects with MDD and controls. Significant P values and Pearson coefficients (r).

| Pearson's r / (P Values) | miR-146a-5p    | miR-146b-5p    | miR-24-3p      | miR-425-3p |
|--------------------------|----------------|----------------|----------------|------------|
| <b>miR-146a-5p</b>       | 1              | X              | X              | X          |
| <b>miR-146b-5p</b>       | 0.91 (9.2E-20) | 1              | X              | X          |
| <b>miR-24-3p</b>         | 0.91 (2.8E-20) | 0.88 (7.0E-18) | 1              | X          |
| <b>miR-425-3p</b>        | 0.92 (9.9E-22) | 0.92 (6.2E-22) | 0.94 (2.5E-24) | 1          |

**Supplementary Table 10. Discovery Cohort – Predicted target genes involved in MAPK and Wnt signaling pathways:** Correlation analysis between the expression of miR-146a-5p, miR-146b-5p, miR-24-3p and miR-425-3p with genes identified through our computational analysis. Most of the predicted targets were significantly correlated with one or more of the miRNAs tested (32 out of 36 genes, 89%).

| <b>Gene Symbol</b> | <b># of Pathways</b> | <b>Signaling Pathway</b> | <b>Correlated with miRNAs</b> |
|--------------------|----------------------|--------------------------|-------------------------------|
| CACNA1E            | 2                    | MAPK                     | Yes                           |
| MAPT               | 1                    | MAPK                     | Yes                           |
| NTRK2              | 1                    | MAPK                     | Yes                           |
| PDGFRB             | 2                    | MAPK                     | Yes                           |
| PPM1A              | 1                    | MAPK                     | Yes                           |
| SRF                | 1                    | MAPK                     | Yes                           |
| PRKACA             | 3                    | MAPK, Wnt                | Yes                           |
| PRKCA              | 3                    | MAPK, Wnt                | Yes                           |
| PRKCB              | 3                    | MAPK, Wnt                | Yes                           |
| RAC1               | 3                    | MAPK, Wnt                | Yes                           |
| CTNNBIP1           | 1                    | Wnt                      | Yes                           |
| NFAT5              | 1                    | Wnt                      | Yes                           |
| PPP2R1B            | 1                    | Wnt                      | Yes                           |
| SMAD3              | 2                    | Wnt                      | Yes                           |
| RPS6KA3            | 1                    | MAPK                     | Yes                           |
| MAPK8              | 2                    | MAPK, Wnt                | Yes                           |
| PRKACB             | 3                    | MAPK, Wnt                | Yes                           |
| CAMK2D             | 2                    | Wnt                      | Yes                           |
| TBL1X              | 1                    | Wnt                      | Yes                           |
| WNT7B              | 1                    | Wnt                      | Yes                           |
| ACVR1B             | 3                    | MAPK                     | Yes                           |
| EGFR               | 4                    | MAPK                     | Yes                           |
| FGF2               | 1                    | MAPK                     | Yes                           |
| MAP3K8             | 1                    | MAPK                     | Yes                           |
| MRAS               | 1                    | MAPK                     | Yes                           |
| PDGFRA             | 3                    | MAPK                     | Yes                           |
| ZAK                | 1                    | MAPK                     | Yes                           |
| NFATC2             | 2                    | MAPK, Wnt                | Yes                           |
| FZD3               | 1                    | Wnt                      | Yes                           |
| SMAD4              | 2                    | Wnt                      | Yes                           |
| VANGL2             | 1                    | Wnt                      | Yes                           |
| MAPK14             | 1                    | MAPK                     | Yes                           |
| RASGRF1            | 1                    | MAPK                     | No                            |
| RPS6KA6            | 2                    | MAPK                     | No                            |
| CXXC4              | 1                    | Wnt                      | No                            |
| SMAD2              | 1                    | Wnt                      | No                            |

**Supplementary Table 11. Discovery Cohort – Predicted target genes involved in MAPK and Wnt signaling pathways:** Differential expression analysis of MAPK/Wnt genes identified through our computational analysis. Most of the predicted targets were significantly dysregulated after duloxetine treatment (25 out of 36 genes, 69%).

| Gene Name | Responders |         |      |             | Non-Responders |         |      |            |
|-----------|------------|---------|------|-------------|----------------|---------|------|------------|
|           | T0 Mean    | T8 Mean | FC   | P value     | T0 Mean        | T8 Mean | FC   | P value    |
| PPM1A     | 4.55       | 5.41    | 1.19 | 0.004420326 | 4.62           | 4.34    | 0.94 | 0.49965897 |
| PRKCB     | 319.72     | 338.64  | 1.06 | 0.060316585 | 322.24         | 326.96  | 1.01 | 0.7897703  |
| CAMK2D    | 2.61       | 2.82    | 1.08 | 0.057039768 | 2.69           | 2.69    | 1.00 | 0.98554325 |
| NFAT5     | 6.50       | 7.31    | 1.12 | 0.03572427  | 7.75           | 7.50    | 0.97 | 0.7655441  |
| NTRK2     | 2.36       | 2.52    | 1.07 | 0.051177796 | 2.44           | 2.33    | 0.95 | 0.3864045  |
| FGF2      | 2.61       | 2.79    | 1.07 | 0.08750842  | 2.82           | 2.66    | 0.94 | 0.3462899  |
| MAP3K8    | 45.66      | 49.45   | 1.08 | 0.045875274 | 38.48          | 43.25   | 1.12 | 0.5140519  |
| PDGFRA    | 2.89       | 3.12    | 1.08 | 0.046876404 | 2.89           | 2.63    | 0.91 | 0.13049328 |
| SMAD4     | 94.10      | 100.68  | 1.07 | 0.049906548 | 83.09          | 89.14   | 1.07 | 0.6193001  |
| CTNNBIP1  | 8.75       | 10.30   | 1.18 | 0.036455154 | 12.65          | 11.97   | 0.95 | 0.7602985  |
| MRAS      | 3.14       | 3.41    | 1.09 | 0.050751105 | 3.31           | 3.72    | 1.13 | 0.19830658 |
| NFATC2    | 2.36       | 2.52    | 1.07 | 0.051177796 | 2.44           | 2.33    | 0.95 | 0.3864045  |
| EGFR      | 2.61       | 2.80    | 1.07 | 0.06554178  | 2.17           | 2.26    | 1.04 | 0.3559935  |
| MAPK8     | 3.12       | 3.42    | 1.08 | 0.044178944 | 3.28           | 3.41    | 1.04 | 0.6857121  |
| MAPK14    | 5.04       | 5.74    | 1.14 | 0.03593131  | 6.52           | 5.15    | 0.79 | 0.19701816 |
| SRF       | 182.04     | 191.19  | 1.05 | 0.041735854 | 178.86         | 185.74  | 1.04 | 0.3582986  |
| ACVR1B    | 38.13      | 41.21   | 1.08 | 0.034682844 | 38.13          | 41.15   | 1.08 | 0.48104617 |
| PPP2R1B   | 2.53       | 2.70    | 1.07 | 0.07770063  | 2.96           | 2.82    | 0.95 | 0.46333113 |
| PRKACB    | 6.91       | 7.87    | 1.06 | 0.07025041  | 7.00           | 7.14    | 1.02 | 0.8925169  |
| RAC1      | 503.27     | 522.19  | 1.04 | 0.07871647  | 507.27         | 493.01  | 0.97 | 0.41145188 |
| FZD3      | 4.72       | 4.66    | 0.99 | 0.8001341   | 4.83           | 4.48    | 0.93 | 0.49779695 |
| MAPT      | 4.66       | 4.32    | 0.93 | 0.22382466  | 3.99           | 4.15    | 1.04 | 0.5721705  |
| PRKACA    | 2.31       | 2.54    | 1.10 | 0.002043212 | 2.28           | 2.48    | 1.09 | 0.21436845 |
| VANGL2    | 3.20       | 3.04    | 0.95 | 0.28532743  | 3.11           | 3.22    | 1.03 | 0.7330913  |
| ZAK       | 3.16       | 3.04    | 0.96 | 0.3574143   | 3.47           | 3.03    | 0.87 | 0.2767202  |
| PRKCA     | 59.32      | 62.56   | 1.05 | 0.08641608  | 61.85          | 56.12   | 0.91 | 0.16824569 |
| WNT7B     | 3.29       | 3.15    | 0.96 | 0.37274805  | 3.10           | 3.04    | 0.98 | 0.7147429  |
| RPS6KA3   | 2.97       | 3.28    | 1.09 | 0.012417246 | 3.08           | 3.11    | 1.01 | 0.9133113  |
| SMAD3     | 72.74      | 77.46   | 1.07 | 0.05446795  | 80.96          | 78.07   | 0.96 | 0.3105279  |
| PDGFRB    | 3.55       | 3.61    | 1.02 | 0.7372547   | 4.35           | 4.11    | 0.95 | 0.53927463 |
| CACNA1E   | 3.84       | 4.22    | 1.10 | 0.069353946 | 4.02           | 4.08    | 1.02 | 0.86569136 |
| TBL1X     | 317.96     | 309.47  | 0.97 | 0.44723037  | 304.89         | 307.98  | 1.01 | 0.87157595 |
| SMAD2     | 8.45       | 8.17    | 0.97 | 0.5262408   | 8.00           | 7.97    | 1.00 | 0.97446495 |
| RPS6KA6   | 2.69       | 2.62    | 0.97 | 0.39195198  | 2.64           | 2.65    | 1.00 | 0.9641064  |
| CXXC4     | 2.60       | 2.63    | 1.01 | 0.76980865  | 2.69           | 2.90    | 1.08 | 0.4009055  |
| RASGRF1   | 2.79       | 2.85    | 1.02 | 0.5967571   | 2.76           | 2.66    | 0.96 | 0.5654304  |



**Supplementary Table 12. Replication cohort – Predicted target genes involved in MAPK and Wnt signaling pathways:** Correlation analysis between the expression of miR-146a-5p, miR-146b-5p, miR-24-3p and miR-425-3p with genes identified through our computational analysis. Most of the predicted targets were significantly correlated with one or more of the miRNAs tested (20 out of 28 genes, 71%).

| <b>Gene Symbol</b> | <b># of Pathways</b> | <b>Signaling Pathway</b> | <b>Correlated with miRNAs</b> |
|--------------------|----------------------|--------------------------|-------------------------------|
| <b>PRKCA</b>       | 3                    | MAPK, Wnt                | <b>Yes</b>                    |
| <b>PRKCB</b>       | 3                    | MAPK, Wnt                | <b>Yes</b>                    |
| <b>RAC1</b>        | 3                    | MAPK, Wnt                | <b>Yes</b>                    |
| <b>CTNNBIP1</b>    | 1                    | Wnt                      | <b>Yes</b>                    |
| <b>NFAT5</b>       | 1                    | Wnt                      | <b>Yes</b>                    |
| <b>SMAD3</b>       | 2                    | Wnt                      | <b>Yes</b>                    |
| <b>RPS6KA3</b>     | 1                    | MAPK                     | <b>Yes</b>                    |
| <b>PRKACB</b>      | 3                    | MAPK, Wnt                | <b>Yes</b>                    |
| <b>CAMK2D</b>      | 2                    | Wnt                      | <b>Yes</b>                    |
| <b>ACVR1B</b>      | 3                    | MAPK                     | <b>Yes</b>                    |
| <b>EGFR</b>        | 4                    | MAPK                     | <b>Yes</b>                    |
| <b>MAPK14</b>      | 1                    | MAPK                     | <b>Yes</b>                    |
| <b>FZD3</b>        | 1                    | Wnt                      | <b>Yes</b>                    |
| <b>SMAD2</b>       | 1                    | Wnt                      | <b>Yes</b>                    |
| <b>MAPT</b>        | 1                    | MAPK                     | <b>Yes</b>                    |
| <b>NTRK2</b>       | 1                    | MAPK                     | <b>Yes</b>                    |
| <b>PPP2R1B</b>     | 1                    | Wnt                      | <b>Yes</b>                    |
| <b>ZAK</b>         | 1                    | MAPK                     | <b>Yes</b>                    |
| <b>CXXC4</b>       | 1                    | Wnt                      | <b>Yes</b>                    |
| <b>VANGL2</b>      | 1                    | Wnt                      | <b>Yes</b>                    |
| <b>PDGFRB</b>      | 2                    | MAPK                     | No                            |
| <b>SRF</b>         | 1                    | MAPK                     | No                            |
| <b>MRAS</b>        | 1                    | MAPK                     | No                            |
| <b>PPM1A</b>       | 1                    | MAPK                     | No                            |
| <b>PRKACA</b>      | 3                    | MAPK, Wnt                | No                            |
| <b>TBL1X</b>       | 1                    | Wnt                      | No                            |
| <b>RASGRF1</b>     | 1                    | MAPK                     | No                            |
| <b>NFATC2</b>      | 2                    | MAPK, Wnt                | No                            |

**Supplementary Table 13. Overexpression of miRNAs – Dysregulation of MAPK and Wnt genes:** HEK293 cells were transfected for 24 hrs with a miRNA mimic for each of the individual miRNAs (miR-146a-5p, miR-146b-5p, miR-24-3p and miR-425-3p), a mock vehicle control or a miRNA-mimic scramble control. Results were compared to untreated control cells. All of the MAPK/Wnt genes tested were down-regulated by at least one of the miRNA mimics transfected. Bold font denotes statistical significance.

| Gene              | Untrs Ctrl | Vehicle Ctrl | Mimic Scramble | Mimic (miR-146a-5p) | Mimic (miR-146b-5p) | Mimic (miR-24-3p) | Mimic (miR-425-3p) |
|-------------------|------------|--------------|----------------|---------------------|---------------------|-------------------|--------------------|
| <b>NTRK2 (T1)</b> | 1          | 0,9563       | 0,6539         | <b>0,0308</b>       | <b>0,0046</b>       | <b>0,0044</b>     | <b>0,0008</b>      |
| <b>MAPK8</b>      | 1          | 0,1684       | 0,1195         | <b>0,0052</b>       | <b>0,0153</b>       | <b>0,0305</b>     | <b>0,0006</b>      |
| <b>MAPT</b>       | 1          | 0,3775       | 0,2521         | <b>0,0070</b>       | <b>0,0012</b>       | <b>0,0764</b>     | <b>0,0173</b>      |
| <b>PRKACA</b>     | 1          | 0,5554       | 0,4658         | <b>0,0312</b>       | <b>0,0183</b>       | <b>0,0929</b>     | <b>0,0094</b>      |
| <b>PDGFRB</b>     | 1          | 0,1432       | 0,6751         | <b>0,0287</b>       | <b>0,0500</b>       | <b>0,0530</b>     | <b>0,0313</b>      |
| <b>RPS6KA3</b>    | 1          | 0,5985       | 0,3422         | <b>0,0284</b>       | <b>0,0091</b>       | <b>0,0137</b>     | 0,1300             |
| <b>ZAK</b>        | 1          | 0,6916       | 0,2545         | <b>0,0178</b>       | <b>0,0122</b>       | <b>0,0115</b>     | 0,1437             |
| <b>PPM1A</b>      | 1          | 0,7750       | 0,2107         | <b>0,0013</b>       | <b>0,0091</b>       | <b>0,0004</b>     | 0,1782             |
| <b>FGF2</b>       | 1          | 0,6269       | 0,8467         | <b>0,0039</b>       | <b>0,0162</b>       | <b>0,0187</b>     | 0,2939             |
| <b>PDGFRA</b>     | 1          | 0,6373       | 0,3221         | 0,3271              | <b>0,0370</b>       | <b>0,0245</b>     | <b>0,0347</b>      |
| <b>MAPK14</b>     | 1          | 0,7948       | 0,5130         | <b>0,0265</b>       | <b>0,0335</b>       | <b>0,0447</b>     | 0,3475             |
| <b>PRKCA</b>      | 1          | 0,2576       | 0,4252         | 0,7020              | <b>0,0037</b>       | <b>0,0036</b>     | <b>0,0277</b>      |
| <b>PRKACB</b>     | 1          | 0,7682       | 0,2054         | <b>0,0042</b>       | 0,8559              | <b>0,0087</b>     | <b>0,0403</b>      |
| <b>SRF</b>        | 1          | 0,4667       | 0,4550         | <b>0,0610</b>       | <b>0,0111</b>       | <b>0,0481</b>     | <b>0,0630</b>      |
| <b>RAC1</b>       | 1          | 0,9366       | 0,0897         | <b>0,0581</b>       | <b>0,0005</b>       | <b>0,0994</b>     | <b>0,0301</b>      |
| <b>ACVR1B</b>     | 1          | 0,6816       | 0,3242         | <b>0,0279</b>       | 0,1644              | <b>0,0756</b>     | <b>0,0079</b>      |
| <b>EGFR</b>       | 1          | 0,8678       | 0,2799         | <b>0,0126</b>       | <b>0,0395</b>       | <b>0,0972</b>     | 0,1635             |
| <b>MAP3K8</b>     | 1          | 0,4425       | 0,8417         | 0,2709              | <b>0,0226</b>       | <b>0,0047</b>     | <b>0,0733</b>      |
| <b>RPS6KA6</b>    | 1          | 0,3079       | 0,7932         | 0,8192              | <b>0,0102</b>       | <b>0,0025</b>     | <b>0,0835</b>      |
| <b>NFATC2</b>     | 1          | 0,7783       | 0,4279         | 0,9689              | <b>0,0305</b>       | <b>0,0488</b>     | 0,1449             |
| <b>PRKCB</b>      | 1          | 0,4853       | 0,7585         | 0,7473              | 0,6636              | <b>0,0344</b>     | <b>0,0312</b>      |
| <b>MRAS</b>       | 1          | 0,2844       | 0,2957         | <b>0,0865</b>       | <b>0,0563</b>       | 0,5540            | <b>0,0455</b>      |
| <b>RASGRF1</b>    | 1          | 0,7801       | 0,1900         | 0,2000              | 0,2403              | <b>0,0777</b>     | 0,3971             |
| <b>B Actin</b>    | 1          | 0,6533       | 0,2446         | 0,5980              | 0,5678              | 0,3883            | 0,1525             |
| <b>GAPDH</b>      | 1          | 0,5548       | 0,3238         | 0,3210              | 0,1964              | 0,7436            | 0,6392             |

**Supplementary Table 14. MAPK and Wnt genes:** Most of these genes have been previously associated with MDD or antidepressant activity (*supplementary references*).

| #  | Gene Symbol | Signaling Pathway | Literature References MDD or AD Treatment | Literature References Other Psychiatric Disorders |
|----|-------------|-------------------|-------------------------------------------|---------------------------------------------------|
| 1  | CACNA1E     | MAPK              | 1,2                                       |                                                   |
| 2  | MAPT        | MAPK              | 3                                         |                                                   |
| 3  | NTRK2       | MAPK              | 4,5,6                                     |                                                   |
| 4  | PDGFRB      | MAPK              | 7                                         |                                                   |
| 5  | PPM1A       | MAPK              | 8                                         |                                                   |
| 6  | SRF         | MAPK              | 9,1                                       |                                                   |
| 7  | PRKACA      | MAPK, Wnt         | 11                                        |                                                   |
| 8  | PRKCA       | MAPK, Wnt         | 12                                        |                                                   |
| 9  | PRKCB       | MAPK, Wnt         | 13,14                                     |                                                   |
| 10 | RAC1        | MAPK, Wnt         | 15                                        |                                                   |
| 11 | CTNBP1      | Wnt               | 16                                        |                                                   |
| 12 | NFAT5       | Wnt               | 17                                        |                                                   |
| 13 | PPP2R1B     | Wnt               | 18                                        |                                                   |
| 14 | SMAD3       | Wnt               | 19,2                                      |                                                   |
| 15 | RPS6KA3     | MAPK              | 21                                        |                                                   |
| 16 | MAPK8       | MAPK, Wnt         | 22                                        |                                                   |
| 17 | PRKACB      | MAPK, Wnt         | 11                                        |                                                   |
| 18 | CAMK2D      | Wnt               | 23                                        |                                                   |
| 19 | TBLIX       | Wnt               |                                           |                                                   |
| 20 | WNT7B       | Wnt               | 21                                        |                                                   |
| 21 | ACVR1B      | MAPK              | 7                                         |                                                   |
| 22 | EGFR        | MAPK              | 24,25                                     |                                                   |
| 23 | FGF2        | MAPK              | 26,27                                     |                                                   |
| 24 | MAP3K8      | MAPK              |                                           | 28                                                |
| 25 | MAPK14      | MAPK              |                                           | 29                                                |
| 26 | MRAS        | MAPK              |                                           |                                                   |
| 27 | PDGFRA      | MAPK              | 30,31                                     |                                                   |
| 28 | RASGRF1     | MAPK              | 32,33                                     |                                                   |
| 29 | RPS6KA6     | MAPK              | 34                                        |                                                   |
| 30 | ZAK         | MAPK              |                                           |                                                   |
| 31 | NFATC2      | MAPK, Wnt         | 35                                        |                                                   |
| 32 | CXXC4       | Wnt               |                                           |                                                   |
| 33 | FZD3        | Wnt               | 36,37                                     |                                                   |
| 34 | SMAD2       | Wnt               | 19,38                                     |                                                   |
| 35 | SMAD4       | Wnt               | 38,39                                     |                                                   |
| 36 | VANGL2      | Wnt               | 40                                        |                                                   |

**Supplementary Table 15. Primers:** Complete list of primers used for qRT-PCR experiments

| <b>Gene</b>        | <b>TaqMan Assay ID</b> |
|--------------------|------------------------|
| <b>miR-146a-5p</b> | #000468                |
| <b>miR-146b-5p</b> | #001097                |
| <b>miR-24-3p</b>   | #000402                |
| <b>miR-425-3p</b>  | #002302                |
| <b>ACVR1B</b>      | Hs00244715_m1          |
| <b>EGFR</b>        | Hs01076090_m1          |
| <b>FGF2</b>        | Hs00266645_m1          |
| <b>MAP3K8</b>      | Hs00178297_m1          |
| <b>MAPK14</b>      | Hs01051152_m1          |
| <b>MAPK8</b>       | Hs01548508_m1          |
| <b>MAPT</b>        | Hs00902194_m1          |
| <b>MRAS</b>        | Hs00171926_m1          |
| <b>NFATC2</b>      | Hs00905451_m1          |
| <b>NTRK2 (T1)</b>  | Hs01093110_m1          |
| <b>PDGFRA</b>      | Hs00998026_m1          |
| <b>PDGFRB</b>      | Hs01019589_m1          |
| <b>PPM1A</b>       | Hs01056778_g1          |
| <b>PRKACA</b>      | Hs00427274_m1          |
| <b>PRKACB</b>      | Hs01086757_m1          |
| <b>PRKCA</b>       | Hs00925193_m1          |
| <b>PRKCB</b>       | Hs00176998_m1          |
| <b>RAC1</b>        | Hs01902432_s1          |
| <b>RASGRF1</b>     | Hs00182314_m1          |
| <b>RPS6KA3</b>     | Hs00177936_m1          |
| <b>RPS6KA6</b>     | Hs00179523_m1          |

## SUPPLEMENTARY REFERENCES

1. Lavebratt, C., Aberg, E., Sjöholm, L. K. & Forsell, Y. Variations in FKBP5 and BDNF genes are suggestively associated with depression in a Swedish population-based cohort. *Journal of affective disorders* 125, 249-255, doi:10.1016/j.jad.2010.02.113 (2010).
2. Drago, A. et al. AKAP13, CACNA1, GRIK4 and GRIA1 genetic variations may be associated with haloperidol efficacy during acute treatment. *European neuropsychopharmacology : the journal of the European College of Neuropsychopharmacology* 23, 887-894, doi:10.1016/j.euroneuro.2012.08.013 (2013).
3. Romano, A. et al. Depressive-like behavior is paired to monoaminergic alteration in a murine model of Alzheimer's disease. *Int J Neuropsychopharmacol* 18, doi:10.1093/ijnp/pyu020 (2015).
4. Maussion, G. et al. Regulation of a truncated form of tropomyosin-related kinase B (TrkB) by Hsa-miR-185\* in frontal cortex of suicide completers. *PLoS One* 7, e39301, doi:10.1371/journal.pone.0039301 (2012).
5. Wang, J. W., Dranovsky, A. & Hen, R. The when and where of BDNF and the antidepressant response. *Biol Psychiatry* 63, 640-641, doi:10.1016/j.biopsych.2008.01.008 (2008).
6. Ernst, C., Chen, E. S. & Turecki, G. Histone methylation and decreased expression of TrkB.T1 in orbital frontal cortex of suicide completers. *Mol Psychiatry* 14, 830-832, doi:10.1038/mp.2009.35 (2009).
7. Kruk, J. S. et al. Fluoxetine-induced transactivation of the platelet-derived growth factor type beta receptor reveals a novel heterologous desensitization process. *Molecular and cellular neurosciences* 65, 45-51, doi:10.1016/j.mcn.2015.02.013 (2015).
8. Malki, K. et al. Convergent animal and human evidence suggests a role of PPM1A gene in response to antidepressants. *Biol Psychiatry* 69, 360-365, doi:10.1016/j.biopsych.2010.08.011 (2011).
9. Xu, F. et al. Differential co-expression and regulation analyses reveal different mechanisms underlying major depressive disorder and subsyndromal symptomatic depression. *BMC bioinformatics* 16, 112, doi:10.1186/s12859-015-0543-y (2015).
10. Nestler, E. J. Role of the Brain's Reward Circuitry in Depression: Transcriptional Mechanisms. *International review of neurobiology* 124, 151-170, doi:10.1016/bs.irn.2015.07.003 (2015).
11. Shelton, R. C., Hal Manier, D. & Lewis, D. A. Protein kinases A and C in post-mortem prefrontal cortex from persons with major depression and normal controls. *Int J Neuropsychopharmacol* 12, 1223-1232, doi:10.1017/S1461145709000285 (2009).
12. Carroll, L. S. et al. Evidence for rare and common genetic risk variants for schizophrenia at protein kinase C, alpha. *Mol Psychiatry* 15, 1101-1111, doi:10.1038/mp.2009.96 (2010).
13. Costas, J. et al. Association study of 44 candidate genes with depressive and anxiety symptoms in post-partum women. *J Psychiatr Res* 44, 717-724, doi:10.1016/j.jpsychires.2009.12.012 (2010).
14. Sakaida, M. et al. Electroconvulsive seizure-induced changes in gene expression in the mouse hypothalamic paraventricular nucleus. *J Psychopharmacol* 27, 1058-1069, doi:10.1177/0269881113497612 (2013).
15. Golden, S. A. et al. Epigenetic regulation of RAC1 induces synaptic remodeling in stress disorders and depression. *Nature medicine* 19, 337-344, doi:10.1038/nm.3090 (2013).
16. Wei, Y. B., Backlund, L., Wegener, G., Mathe, A. A. & Lavebratt, C. Telomerase dysregulation in the hippocampus of a rat model of depression: normalization by lithium. *Int J Neuropsychopharmacol* 18, pyv002, doi:10.1093/ijnp/pyv002 (2015).
17. Ploski, J. E., Newton, S. S. & Duman, R. S. Electroconvulsive seizure-induced gene expression profile of the hippocampus dentate gyrus granule cell layer. *Journal of neurochemistry* 99, 1122-1132, doi:10.1111/j.1471-4159.2006.04156.x (2006).
18. Kim, S. & Webster, M. J. Integrative genome-wide association analysis of cytoarchitectural abnormalities in the prefrontal cortex of psychiatric disorders. *Mol Psychiatry* 16, 452-461, doi:10.1038/mp.2010.23 (2011).
19. Park, S. H. et al. Melittin inhibits TGF-beta-induced pro-fibrotic gene expression through the suppression of the TGFbetaRII-Smad, ERK1/2 and JNK-mediated signaling pathway. *The American journal of Chinese medicine* 42, 1139-1152, doi:10.1142/S0192415X14500712 (2014).
20. Ganea, K. et al. Convergent animal and human evidence suggests the activin/inhibin pathway to be involved in antidepressant response. *Translational psychiatry* 2, e177, doi:10.1038/tp.2012.104 (2012).
21. Bergstrom, A., Jayatissa, M. N., Thykjaer, T. & Wiborg, O. Molecular pathways associated with stress resilience and drug resistance in the chronic mild stress rat model of depression: a gene expression study. *Journal of molecular neuroscience : MN* 33, 201-215 (2007).
22. Malki, K. et al. Antidepressant-dependent mRNA changes in mouse associated with hippocampal neurogenesis in a mouse model of depression. *Pharmacogenetics and genomics* 22, 765-776, doi:10.1097/FPC.0b013e328356fa90 (2012).

23. Drago, A., Cocchi, E., Crisafulli, C. & Serretti, A. A molecular pathway analysis of the glutamatergic-monoaminergic interplay serves to investigate the number of depressive records during citalopram treatment. *J Neural Transm (Vienna)* 122, 465-475, doi:10.1007/s00702-014-1267-2 (2015).
24. Tian, W. et al. A study of the functional significance of epidermal growth factor in major depressive disorder. *Psychiatric genetics* 22, 161-167, doi:10.1097/YPG.0b013e3283539550 (2012).
25. Yamamori, H. et al. Assessment of a multi-assay biological diagnostic test for mood disorders in a Japanese population. *Neuroscience letters* 612, 167-171, doi:10.1016/j.neulet.2015.12.019 (2016).
26. Birey, F. et al. Genetic and Stress-Induced Loss of NG2 Glia Triggers Emergence of Depressive-like Behaviors through Reduced Secretion of FGF2. *Neuron* 88, 941-956, doi:10.1016/j.neuron.2015.10.046 (2015).
27. Borroto-Escuela, D. O., Tarakanov, A. O. & Fuxe, K. FGFR1-5-HT1A Heteroreceptor Complexes: Implications for Understanding and Treating Major Depression. *Trends in neurosciences* 39, 5-15, doi:10.1016/j.tins.2015.11.003 (2016).
28. Schwarz, R. et al. A preliminary study on methylphenidate-regulated gene expression in lymphoblastoid cells of ADHD patients. *The world journal of biological psychiatry : the official journal of the World Federation of Societies of Biological Psychiatry* 16, 180-189, doi:10.3109/15622975.2014.948064 (2015).
29. Onwuameze, O. E. et al. MAPK14 and CNR1 gene variant interactions: effects on brain volume deficits in schizophrenia patients with marijuana misuse. *Psychological medicine* 43, 619-631, doi:10.1017/S0033291712001559 (2013).
30. Elsayed, M. et al. Antidepressant effects of fibroblast growth factor-2 in behavioral and cellular models of depression. *Biol Psychiatry* 72, 258-265, doi:10.1016/j.biopsych.2012.03.003 (2012).
31. Sathyanesan, M. et al. A molecular characterization of the choroid plexus and stress-induced gene regulation. *Translational psychiatry* 2, e139, doi:10.1038/tp.2012.64 (2012).
32. Fabbri, C. & Serretti, A. Genetics of long-term treatment outcome in bipolar disorder. *Progress in neuro-psychopharmacology & biological psychiatry* 65, 17-24, doi:10.1016/j.pnpbp.2015.08.008 (2016).
33. Darcy, M. J., Trouche, S., Jin, S. X. & Feig, L. A. Age-dependent role for Ras-GRF1 in the late stages of adult neurogenesis in the dentate gyrus. *Hippocampus* 24, 315-325, doi:10.1002/hipo.22225 (2014).
34. Smagin, D. A. et al. Dysfunction in Ribosomal Gene Expression in the Hypothalamus and Hippocampus following Chronic Social Defeat Stress in Male Mice as Revealed by RNA-Seq. *Neural plasticity* 2016, 3289187, doi:10.1155/2016/3289187 (2016).
35. Inkster, B. et al. Pathway-based approaches to imaging genetics association studies: Wnt signaling, GSK3beta substrates and major depression. *NeuroImage* 53, 908-917, doi:10.1016/j.neuroimage.2010.02.065 (2010).
36. Hashimoto, R. et al. Association study of the frizzled-3 (FZD3) gene with schizophrenia and mood disorders. *J Neural Transm (Vienna)* 112, 303-307, doi:10.1007/s00702-004-0264-2 (2005).
37. Keri, S., Szabo, C. & Kelemen, O. Blood biomarkers of depression track clinical changes during cognitive-behavioral therapy. *Journal of affective disorders* 164, 118-122, doi:10.1016/j.jad.2014.04.030 (2014).
38. Dow, A. L., Russell, D. S. & Duman, R. S. Regulation of activin mRNA and Smad2 phosphorylation by antidepressant treatment in the rat brain: effects in behavioral models. *The Journal of neuroscience : the official journal of the Society for Neuroscience* 25, 4908-4916, doi:10.1523/JNEUROSCI.5155-04.2005 (2005).
39. Suda, S., Segi-Nishida, E., Newton, S. S. & Duman, R. S. A postpartum model in rat: behavioral and gene expression changes induced by ovarian steroid deprivation. *Biol Psychiatry* 64, 311-319, doi:10.1016/j.biopsych.2008.03.029 (2008).
40. Okerlund, N. D. & Cheyette, B. N. Synaptic Wnt signaling-a contributor to major psychiatric disorders? *Journal of neurodevelopmental disorders* 3, 162-174, doi:10.1007/s11689-011-9083-6 (2011).
